# Supplementary material for: Effects of Process and Formulation Parameters on Submicron Polymeric Particles Produced by a Rapid Emulsion-Diffusion Method
Source: MDPI journal article supplement (doi:10.3390/nano12020229), 2022-01-11
Supplement: s1 [file s1]

# Effects of Process and Formulation Parameters on Submicron Polymeric Particles Produced by a Rapid Emulsion-Diffusion Method

Clara Luisa Domínguez-Delgado \*, Zubia Akhtar, Godfrey Awuah-Mensah, Braden Siyi Wu and Hugh David Charles Smyth \*

Division of Molecular Pharmaceutics and Drug Delivery, College of Pharmacy, The University of Texas at Austin, 2409 University Avenue, Austin, TX 78712, USA; zubiaakhtar@utexas.edu (Z.A.); gamensah@utexas.edu (G.A.-M.); braden.s.wu@gmail.com (B.S.W.)

\* Correspondence: claralominguezd@gmail.com (C.L.D.-D.); hugh.smyth@austin.utexas.edu (H.D.C.S.); Tel.: +52-553-489-9461 (C.L.D.-D.); +1-512-471-3383 (H.D.C.S.)

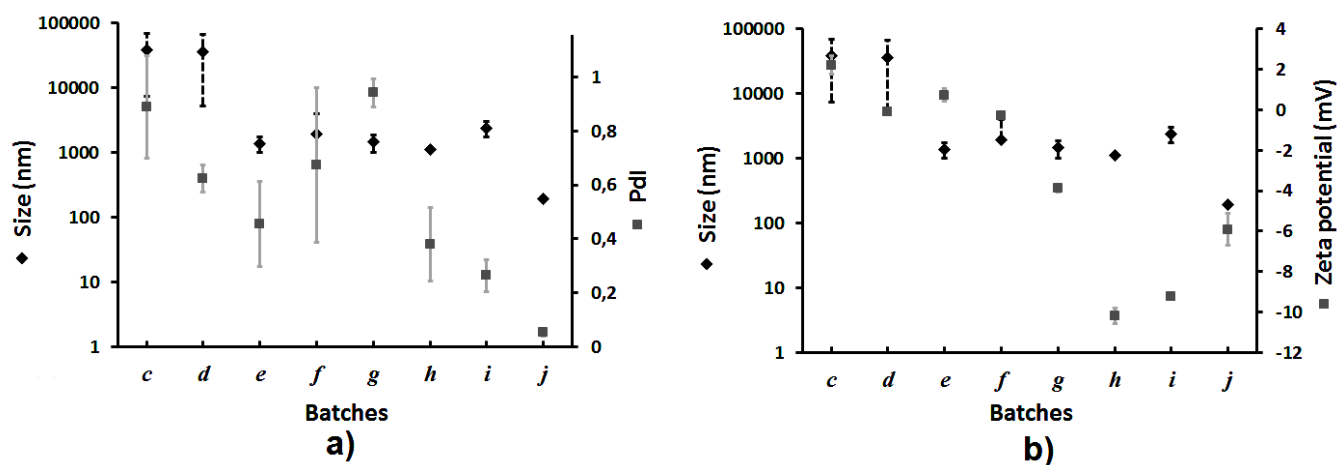

**Figure S1.** a) Batches showing the particle size versus PDI and b) particle size versus the zeta potential in the optimization of the biodegradable NPs (PLGA 85:15 and 50:50) of using different variables reported in Table 2. Bars error =SD, n=3.

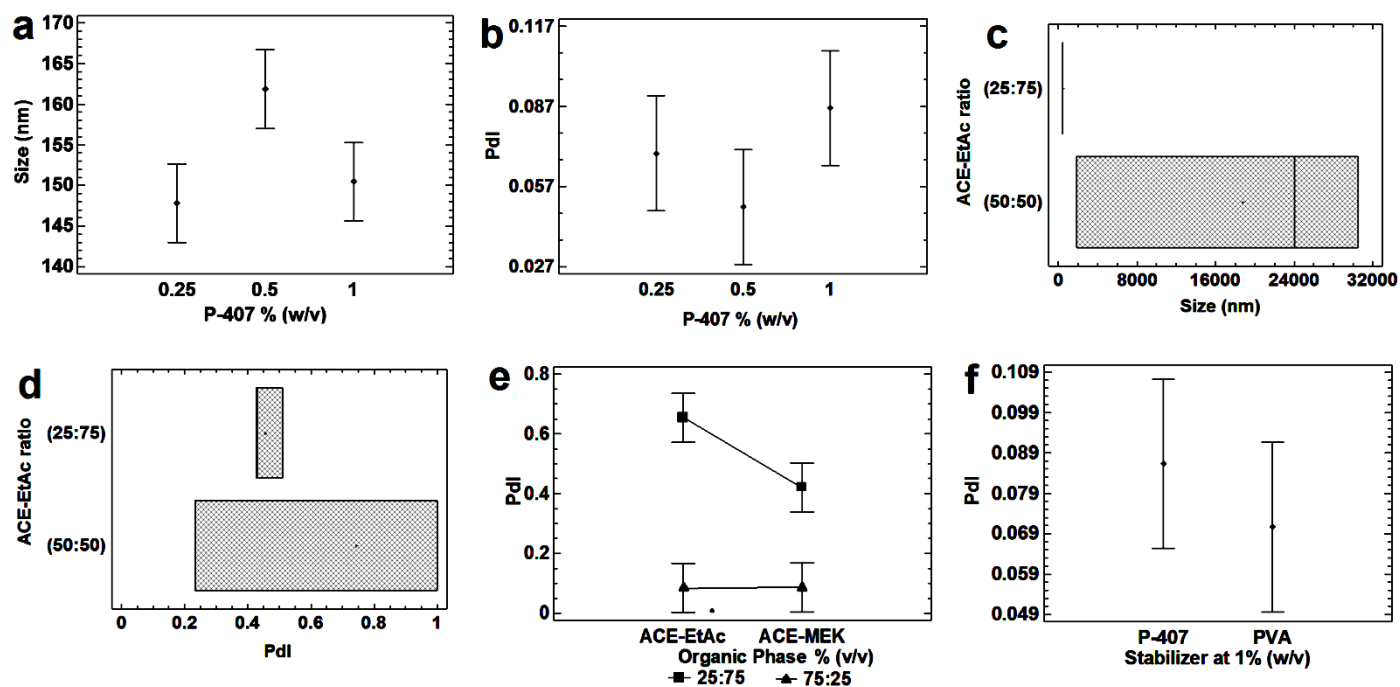

**Figure S2.** Influence of P-407 at three low concentrations using ACE-MEK (75:25) on **a**) the particle size and **b**) PDI (Experimental design 9). Effect of ACE-EtAc at two ratios on the **c**) particle size and **d**) PDI, using P-407 5% (w/v; Experimental design 10). Influence of two solvent blends, as OP, at two ratios on the **e**) PDI, by using P-407 1% as stabilizer (Experimental design 11). Analysis of the effect of P-407 and PVA at 1% on the **f**) PDI, using the solvent blend ACE-MEK (75:25; Experimental design 12). All batches were prepared with 200mg of PLGA (50:50), 2000 rpm, and a ratio of OP:AP (1:2), n=3. All the means bars correspond to the Bonferroni interval at the 95.0% confidence level.

Table S1. Particle size, Zeta potential and PDI of all batches prepared at different formulation and operating conditions.

| Polymer (mg)          | Organic Phase ratio (v/v) | Stabilizer (% w/v) | Stirring rate (rev/min) | Stirrer     | OP:AP ratio | Mean size (nm) ± SD |   |       | Mean PDI ± SD |   |      | Mean Z Potential (mV) ± SD |   |      | Mean pH ± SD |
|-----------------------|---------------------------|--------------------|-------------------------|-------------|-------------|---------------------|---|-------|---------------|---|------|----------------------------|---|------|--------------|
| PLGA (50:50) (200 mg) | THF-EtAc (50:50)          | PVA 2%             | 8000                    | Ultraturrax | (1:2)       | 189,73              | ± | 4,10  | 0,054         | ± | 0,01 | -5,92                      | ± | 0,79 | —            |
| PLGA (50:50) (200 mg) | THF-EtAc (75:25)          | PVA 2%             | 8000                    | Ultraturrax | (1:2)       | 196,60              | ± | 0,70  | 0,053         | ± | 0,01 | -5,23                      | ± | 0,13 | —            |
| PLGA (50:50) (200 mg) | THF-EtAc (25:75)          | PVA 2%             | 8000                    | Ultraturrax | (1:2)       | 223,67              | ± | 6,71  | 0,058         | ± | 0,01 | -5,55                      | ± | 0,19 | —            |
| PLGA (50:50) (200 mg) | EtAc (100)                | PVA 2%             | 8000                    | Ultraturrax | (1:2)       | 308,53              | ± | 10,36 | 0,113         | ± | 0,02 | -6,75                      | ± | 0,43 | —            |
| PLGA (50:50) (200 mg) | ACE-MEK (50:50)           | PVA 2%             | 8000                    | Ultraturrax | (1:2)       | 181,17              | ± | 2,86  | 0,083         | ± | 0,01 | -0,71                      | ± | 0,05 | —            |
| PLGA (50:50) (200 mg) | ACE-MEK (75:25)           | PVA 2%             | 8000                    | Ultraturrax | (1:2)       | 163,67              | ± | 3,70  | 0,068         | ± | 0,01 | -3,88                      | ± | 0,40 | —            |

|                       |                  |        |      |               |       |        |   |        |       |   |      |       |   |      |   |
|-----------------------|------------------|--------|------|---------------|-------|--------|---|--------|-------|---|------|-------|---|------|---|
| PLGA (50:50) (200 mg) | ACE-MEK (25:75)  | PVA 2% | 8000 | Ultraturrax   | (1:2) | 400,70 | ± | 15,55  | 0,259 | ± | 0,02 | -0,40 | ± | 0,19 | — |
| PLGA (50:50) (200 mg) | MEK (100)        | PVA 2% | 8000 | Ultraturrax   | (1:2) | 409,90 | ± | 24,97  | 0,583 | ± | 0,06 | 2,08  | ± | 0,47 | — |
| Eudragit E (200 mg)   | ACE-EtAc (50:50) | PVA 2% | 2000 | Mechanical S. | (1:2) | 254,20 | ± | 10,93  | 0,356 | ± | 0,06 | 13,23 | ± | 1,79 | — |
| Eudragit E (200 mg)   | ACE-EtAc (75:25) | PVA 2% | 2000 | Mechanical S. | (1:2) | 155,33 | ± | 2,85   | 0,092 | ± | 0,01 | 20,27 | ± | 2,98 | — |
| Eudragit E (200 mg)   | ACE-EtAc (25:75) | PVA 2% | 2000 | Mechanical S. | (1:2) | 258,70 | ± | 11,11  | 0,295 | ± | 0,02 | 42,60 | ± | 1,47 | — |
| Eudragit E (200 mg)   | EtAc (100)       | PVA 2% | 2000 | Mechanical S. | (1:2) | 278,90 | ± | 10,74  | 0,238 | ± | 0,01 | 38,80 | ± | 0,85 | — |
| Eudragit E (400 mg)   | ACE-EtAc (50:50) | PVA 2% | 2000 | Mechanical S. | (1:2) | 343,67 | ± | 164,57 | 0,431 | ± | 0,04 | 39,70 | ± | 1,51 | — |

|                     |                     |        |      |               |       |          |   |          |       |   |      |       |   |      |   |
|---------------------|---------------------|--------|------|---------------|-------|----------|---|----------|-------|---|------|-------|---|------|---|
|                     |                     |        |      |               |       |          |   |          |       |   |      |       |   |      |   |
| Eudragit E (400 mg) | ACE-EtAc<br>(75:25) | PVA 2% | 2000 | Mechanical S. | (1:2) | 147,23   | ± | 0,74     | 0,156 | ± | 0,03 | 38,33 | ± | 1,00 | – |
| Eudragit E (400 mg) | ACE-EtAc<br>(25:75) | PVA 2% | 2000 | Mechanical S. | (1:2) | 221,70   | ± | 6,82     | 0,362 | ± | 0,02 | 39,83 | ± | 1,39 | – |
| Eudragit E (400 mg) | EtAc (100)          | PVA 2% | 2000 | Mechanical S. | (1:2) | 315,70   | ± | 13,17    | 0,270 | ± | 0,00 | 42,50 | ± | 0,66 | – |
| Eudragit E (800 mg) | ACE-EtAc<br>(50:50) | PVA 2% | 2000 | Mechanical S. | (1:2) | 16578,77 | ± | 16272,28 | 0,849 | ± | 0,23 | 66,83 | ± | 4,06 | – |
| Eudragit E (800 mg) | ACE-EtAc<br>(75:25) | PVA 2% | 2000 | Mechanical S. | (1:2) | 156,57   | ± | 4,75     | 0,153 | ± | 0,01 | 33,97 | ± | 0,25 | – |
| Eudragit E (800 mg) | ACE-EtAc<br>(25:75) | PVA 2% | 2000 | Mechanical S. | (1:2) | 353,33   | ± | 204,67   | 0,420 | ± | 0,10 | 51,53 | ± | 3,10 | – |

|                     |                 |        |      |               |       |         |   |       |       |   |      |       |   |      |   |
|---------------------|-----------------|--------|------|---------------|-------|---------|---|-------|-------|---|------|-------|---|------|---|
| Eudragit E (800 mg) | EtAc (100)      | PVA 2% | 2000 | Mechanical S. | (1:2) | 346,33  | ± | 11,86 | 0,298 | ± | 0,02 | 41,17 | ± | 0,06 | – |
| Eudragit E (400 mg) | ACE-MEK (50:50) | PVA 2% | 1500 | Mechanical S. | (1:2) | 196,97  | ± | 3,31  | 0,227 | ± | 0,02 | 37,77 | ± | 0,64 | – |
| Eudragit E (400 mg) | ACE-MEK (75:25) | PVA 2% | 1500 | Mechanical S. | (1:2) | 177,63  | ± | 4,58  | 0,153 | ± | 0,00 | 47,37 | ± | 1,53 | – |
| Eudragit E (400 mg) | ACE-MEK (25:75) | PVA 2% | 1500 | Mechanical S. | (1:2) | 1325,33 | ± | 58,76 | 0,640 | ± | 0,06 | 50,43 | ± | 3,43 | – |
| Eudragit E (400 mg) | MEK (100)       | PVA 2% | 1500 | Mechanical S. | (1:2) | 293,50  | ± | 8,11  | 0,269 | ± | 0,00 | 22,23 | ± | 3,18 | – |
| Eudragit E (200 mg) | Et-EtAc (50:50) | PVA 2% | 2000 | Mechanical S. | (1:2) | 172,57  | ± | 2,83  | 0,122 | ± | 0,03 | 15,07 | ± | 1,59 | – |
| Eudragit E (200 mg) | Et-EtAc (75:25) | PVA 2% | 2000 | Mechanical S. | (1:2) | 161,70  | ± | 4,30  | 0,078 | ± | 0,02 | 30,50 | ± | 1,93 | – |

|                     |                 |        |      |               |       |        |   |       |       |   |      |       |   |      |   |
|---------------------|-----------------|--------|------|---------------|-------|--------|---|-------|-------|---|------|-------|---|------|---|
| Eudragit E (200 mg) | Et-EtAc (25:75) | PVA 2% | 2000 | Mechanical S. | (1:2) | 222,27 | ± | 6,07  | 0,192 | ± | 0,01 | 15,07 | ± | 0,67 | – |
| Eudragit E (200 mg) | EtAc (100)      | PVA 2% | 2000 | Mechanical S. | (1:2) | 278,90 | ± | 10,74 | 0,238 | ± | 0,01 | 38,80 | ± | 0,85 | – |
| Eudragit E (200 mg) | Et-EtAc (50:50) | PVA 1% | 2000 | Mechanical S. | (1:2) | 198,03 | ± | 13,05 | 0,283 | ± | 0,02 | 21,13 | ± | 0,87 | – |
| Eudragit E (200 mg) | Et-EtAc (75:25) | PVA 1% | 2000 | Mechanical S. | (1:2) | 175,80 | ± | 5,52  | 0,225 | ± | 0,01 | 45,70 | ± | 1,04 | – |
| Eudragit E (200 mg) | Et-EtAc (25:75) | PVA 1% | 2000 | Mechanical S. | (1:2) | 124,93 | ± | 4,57  | 0,210 | ± | 0,03 | 36,20 | ± | 5,78 | – |
| Eudragit E (200 mg) | EtAc (100)      | PVA 1% | 2000 | Mechanical S. | (1:2) | 220,00 | ± | 6,24  | 0,315 | ± | 0,02 | 43,63 | ± | 1,68 | – |

|                     |                 |          |      |               |       |        |   |       |       |   |      |       |   |      |   |
|---------------------|-----------------|----------|------|---------------|-------|--------|---|-------|-------|---|------|-------|---|------|---|
| Eudragit E (200 mg) | Et-EtAc (50:50) | PVA 5%   | 2000 | Mechanical S. | (1:2) | 221,63 | ± | 11,31 | 0,568 | ± | 0,07 | 22,57 | ± | 0,32 | – |
| Eudragit E (200 mg) | Et-EtAc (75:25) | PVA 5%   | 2000 | Mechanical S. | (1:2) | 127,33 | ± | 10,70 | 0,467 | ± | 0,04 | 23,53 | ± | 0,67 | – |
| Eudragit E (200 mg) | Et-EtAc (25:75) | PVA 5%   | 2000 | Mechanical S. | (1:2) | 122,80 | ± | 1,08  | 0,259 | ± | 0,01 | 23,87 | ± | 2,61 | – |
| Eudragit E (200 mg) | EtAc (100)      | PVA 5%   | 2000 | Mechanical S. | (1:2) | 211,50 | ± | 3,92  | 0,205 | ± | 0,01 | 29,20 | ± | 0,26 | – |
| Eudragit E (200 mg) | Et-EtAc (50:50) | P-407 1% | 2000 | Mechanical S. | (1:2) | 118,23 | ± | 7,77  | 0,338 | ± | 0,07 | 42,40 | ± | 3,77 | – |
| Eudragit E (200 mg) | Et-EtAc (75:25) | P-407 1% | 2000 | Mechanical S. | (1:2) | 49,43  | ± | 0,76  | 0,181 | ± | 0,02 | 26,13 | ± | 3,93 | – |
| Eudragit E (200 mg) | Et-EtAc (25:75) | P-407 1% | 2000 | Mechanical S. | (1:2) | 170,47 | ± | 5,98  | 0,406 | ± | 0,06 | 44,37 | ± | 0,58 | – |



|                     |                 |          |      |               |       |        |   |       |       |   |      |       |   |      |   |
|---------------------|-----------------|----------|------|---------------|-------|--------|---|-------|-------|---|------|-------|---|------|---|
| Eudragit E (200 mg) | EtAc (100)      | P-407 1% | 2000 | Mechanical S. | (1:2) | 267,07 | ± | 55,74 | 0,474 | ± | 0,10 | 26,70 | ± | 4,61 | – |
| Eudragit E (200 mg) | Et-EtAc (50:50) | P-407 2% | 2000 | Mechanical S. | (1:2) | 112,47 | ± | 2,85  | 0,264 | ± | 0,01 | 34,83 | ± | 1,31 | – |
| Eudragit E (200 mg) | Et-EtAc (75:25) | P-407 2% | 2000 | Mechanical S. | (1:2) | 53,47  | ± | 0,20  | 0,153 | ± | 0,01 | 22,67 | ± | 0,67 | – |
| Eudragit E (200 mg) | Et-EtAc (25:75) | P-407 2% | 2000 | Mechanical S. | (1:2) | 316,60 | ± | 34,91 | 0,545 | ± | 0,02 | 37,80 | ± | 2,00 | – |
| Eudragit E (200 mg) | EtAc (100)      | P-407 2% | 2000 | Mechanical S. | (1:2) | 153,50 | ± | 3,21  | 0,440 | ± | 0,05 | 37,20 | ± | 3,56 | – |
| Eudragit E (200 mg) | Et-EtAc (50:50) | P-407 5% | 2000 | Mechanical S. | (1:2) | 128,60 | ± | 3,38  | 0,297 | ± | 0,03 | 32,57 | ± | 1,04 | – |
| Eudragit E (200 mg) | Et-EtAc (75:25) | P-407 5% | 2000 | Mechanical S. | (1:2) | 65,68  | ± | 1,08  | 0,177 | ± | 0,00 | 26,57 | ± | 6,64 | – |

|                       |                 |          |      |               |                |         |   |            |       |   |      |       |   |      |   |
|-----------------------|-----------------|----------|------|---------------|----------------|---------|---|------------|-------|---|------|-------|---|------|---|
| Eudragit E (200 mg)   | Et-EtAc (25:75) | P-407 5% | 2000 | Mechanical S. | (1:2)          | 735,77  | ± | 281,2<br>6 | 0,805 | ± | 0,03 | 34,20 | ± | 2,08 | – |
| Eudragit E (200 mg)   | EtAc (100)      | P-407 5% | 2000 | Mechanical S. | (1:2)          | 273,67  | ± | 13,64      | 0,485 | ± | 0,03 | 31,50 | ± | 0,30 | – |
| PLGA (50:50) (200 mg) | ACE-MEK (50:50) | PVA 2%   | 8000 | Ultraturrax   | (1:2)          | 181,17  | ± | 2,86       | 0,083 | ± | 0,01 | -0,71 | ± | 0,05 | – |
| PLGA (50:50) (200 mg) | ACE-MEK (50:50) | PVA 2%   | 8000 | Ultraturrax   | (1:2 inverted) | 327,73  | ± | 2,94       | 0,460 | ± | 0,08 | -3,75 | ± | 0,15 | – |
| Eudragit E (200 mg)   | MEK (100)       | PVA 2%   | 500  | Mechanical S. | (1:2)          | 7304,67 | ± | 837,0<br>9 | 1,000 | ± | 0,00 | 33,77 | ± | 7,39 | – |
| Eudragit E (200 mg)   | MEK (100)       | PVA 2%   | 1500 | Mechanical S. | (1:2)          | 706,37  | ± | 310,4<br>0 | 0,544 | ± | 0,18 | 42,70 | ± | 3,25 | – |

|                       |                  |        |       |               |       |        |   |            |       |   |      |       |   |      |   |
|-----------------------|------------------|--------|-------|---------------|-------|--------|---|------------|-------|---|------|-------|---|------|---|
| Eudragit E (200 mg)   | MEK (100)        | PVA 2% | 2000  | Mechanical S. | (1:2) | 574,80 | ± | 172,1<br>5 | 0,596 | ± | 0,17 | 21,73 | ± | 3,01 | – |
| Eudragit E (200 mg)   | MEK (100)        | PVA 2% | 3000  | Mechanical S. | (1:2) | 853,27 | ± | 861,6<br>7 | 0,626 | ± | 0,32 | 34,83 | ± | 6,08 | – |
| Eudragit E (400 mg)   | EtAc (100)       | PVA 2% | 2000  | Mechanical S. | (1:2) | 315,70 | ± | 13,17      | 0,270 | ± | 0,00 | 42,50 | ± | 0,66 | – |
| Eudragit E (200 mg)   | EtAc (100)       | PVA 2% | 2000  | Mechanical S. | (1:2) | 278,90 | ± | 10,74      | 0,238 | ± | 0,01 | 38,80 | ± | 0,85 | – |
| PLGA (85:15) (200)    | EtAc (100)       | PVA 2% | 2000  | Mechanical S. | (1:2) | 355,03 | ± | 4,75       | 0,261 | ± | 0,02 | 1,70  | ± | 0,75 | – |
| PLGA (85:15) (200 mg) | THF-EtAc (50:50) | PVA 2% | 8000  | Ultraturrax   | (1:4) | 329,07 | ± | 11,55      | 0,247 | ± | 0,01 | -3,48 | ± | 0,54 | – |
| PLGA (85:15) (200 mg) | THF-EtAc (75:25) | PVA 2% | 11000 | Ultraturrax   | (1:6) | 490,40 | ± | 3,82       | 0,915 | ± | 0,07 | -3,97 | ± | 0,19 | – |

|                      |                  |          |      |               |       |          |   |          |       |   |      |        |   |      |      |   |      |
|----------------------|------------------|----------|------|---------------|-------|----------|---|----------|-------|---|------|--------|---|------|------|---|------|
| Eudragit E (400 mg)  | MEK (100)        | PVA 1%   | 1500 | Mechanical S. | (1:2) | 719,10   | ± | 63,75    | 0,641 | ± | 0,19 | 47,93  | ± | 0,84 | –    |   |      |
| Eudragit E (200 mg)  | THF-EtAc (50:50) | PVA 2%   | 2000 | Mechanical S. | (1:2) | 256,60   | ± | 6,51     | 0,201 | ± | 0,01 | 26,60  | ± | 0,61 | –    |   |      |
| PLGA (50:50), 200 mg | Ac-EtAc (75:25)  | P-407 1% | 2000 | Mechanical S. | (1:2) | 174,00   | ± | 5,03     | 0,083 | ± | 0,03 | -29,83 | ± | 1,45 | 4,38 | ± | 0,07 |
| PLGA (50:50), 200 mg | Ac-EtAc (25:75)  | P-407 1% | 2000 | Mechanical S. | (1:2) | 590,37   | ± | 39,13    | 0,655 | ± | 0,10 | -37,67 | ± | 0,76 | 3,67 | ± | 0,05 |
| PLGA (50:50), 200 mg | Ac-EtAc (50:50)  | P-407 5% | 2000 | Mechanical S. | (1:2) | 18787,00 | ± | 15014,31 | 0,745 | ± | 0,44 | -35,17 | ± | 0,60 | 3,98 | ± | 0,02 |
| PLGA (50:50), 200 mg | Ac-EtAc (25:75)  | P-407 5% | 2000 | Mechanical S. | (1:2) | 465,27   | ± | 6,79     | 0,456 | ± | 0,05 | -32,40 | ± | 1,11 | 3,94 | ± | 0,05 |
| PLGA (50:50), 200 mg | Ac-MEK (25:75)   | P-407 1% | 2000 | Mechanical S. | (1:2) | 400,53   | ± | 14,44    | 0,420 | ± | 0,04 | -25,80 | ± | 2,25 | 3,97 | ± | 0,06 |

|                      |                   |             |      |               |       |        |   |      |       |   |      |        |   |      |      |   |      |
|----------------------|-------------------|-------------|------|---------------|-------|--------|---|------|-------|---|------|--------|---|------|------|---|------|
| PLGA (50:50), 200 mg | Ac-MEK<br>(75:25) | P-407 1%    | 2000 | Mechanical S. | (1:2) | 150,47 | ± | 5,41 | 0,086 | ± | 0,01 | -23,43 | ± | 0,23 | 4,11 | ± | 0,10 |
| PLGA (50:50), 200 mg | Ac-MEK<br>(50:50) | P-407 1%    | 2000 | Mechanical S. | (1:2) | 175,27 | ± | 0,96 | 0,069 | ± | 0,02 | -30,40 | ± | 1,39 | 3,86 | ± | 0,02 |
| PLGA (50:50), 200 mg | Ac-MEK<br>(75:25) | P-407 0.5%  | 2000 | Mechanical S. | (1:2) | 161,87 | ± | 2,65 | 0,049 | ± | 0,02 | -30,23 | ± | 0,95 |      | – |      |
| PLGA (50:50), 200 mg | Ac-MEK<br>(75:25) | PVA 1%      | 2000 | Mechanical S. | (1:2) | 163,27 | ± | 2,86 | 0,071 | ± | 0,02 | -16,13 | ± | 0,78 | 4,49 | ± | 0,01 |
| PLGA (50:50), 200 mg | Ac-MEK<br>(75:25) | P-407 0.25% | 2000 | Mechanical S. | (1:2) | 147,80 | ± | 1,67 | 0,069 | ± | 0,01 | -36,23 | ± | 0,81 | 3,73 | ± | 0,01 |
